# Supplementary material for: MicroRNA and mRNA interactions coordinate the immune response in non-lethal heat stressed Litopenaeus vannamei against AHPND-causing Vibrio parahaemolyticus
Source: PubMed Central journal article supplement (PMC6972907; doi:10.1038/s41598-019-57409-4), 2020-01-21
Supplement: 41598_2019_57409_MOESM1_ESM.pdf [file 41598_2019_57409_MOESM1_ESM.pdf]

**MicroRNA and mRNA interactions coordinate the immune response in non-lethal heat stressed *Litopenaeus vannamei* against AHPND-causing *Vibrio parahaemolyticus***

Pakpoom Boonchuen<sup>1</sup>, Benedict A. Maralit<sup>1,A</sup>, Phattarunda Jaree<sup>1,3</sup>, Anchalee

Tassanakajon<sup>1,2</sup>, Kunlaya Somboonwiwat<sup>1,2,\*</sup>

<sup>1</sup>Center of Excellence for Molecular Biology and Genomics of Shrimp, Department of Biochemistry, Faculty of Science, Chulalongkorn University, Thailand

<sup>2</sup>Omics Science and Bioinformatics Center, Faculty of Science, Chulalongkorn University, Thailand

<sup>3</sup>Institute of Molecular Biosciences, Mahidol University, Salaya, Nakhon Pathom Thailand

<sup>A</sup>Current Addresses: Philippine Genome Center, University of the Philippines, Diliman, Quezon City, Philippines; and National Institute of Molecular Biology and Biotechnology, College of Science, University of the Philippines, Diliman, Quezon City, Philippines

\* Corresponding author: [kunlaya.s@chula.ac.th](mailto:kunlaya.s@chula.ac.th)

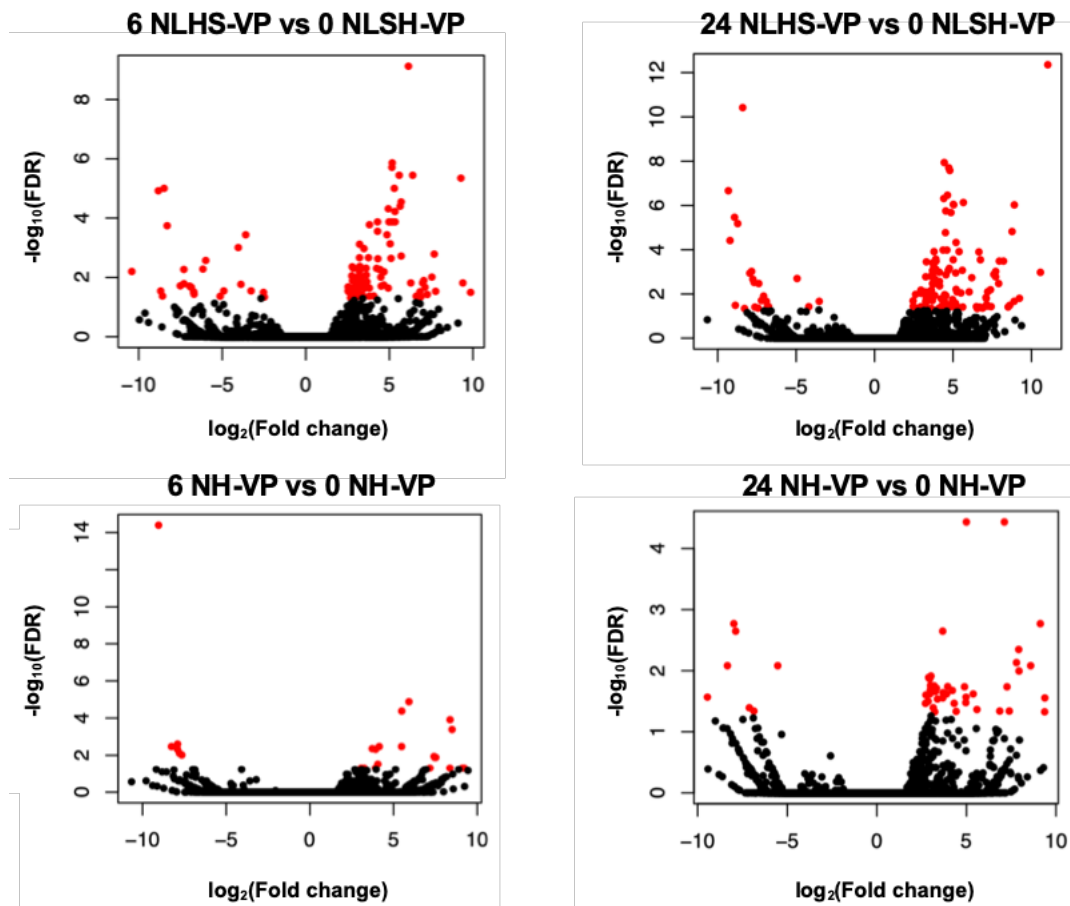

**Fig. S1** Volcano plots illustrating  $\log_{10}(\text{FDR})$  in relation to the  $\log_2(\text{Fold change})$  for 6 NLHS-VP and 24 NLHS-VP conditions versus 0 NLHS-VP control condition and 6 NH-VP and 24 NH-VP conditions versus 0 NH-VP control condition. Genes that passed the significance threshold  $\text{FDR}$  adjusted  $P$ -value  $< 0.05$  and the expression cut-off  $\log_2(\text{fold change}) > 2$  are colored red, while genes outside this range are colored black.

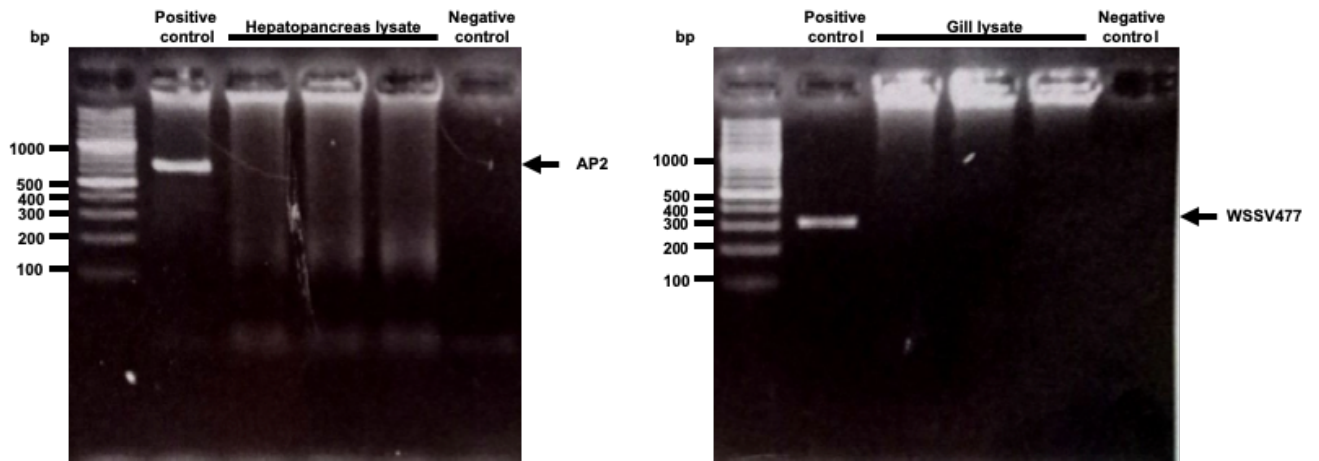

**Fig. S2 Verification of non-VP<sub>AHPND</sub> and -WSSV-infected shrimp samples by PCR.** Gills and hepatopancreas of 3 shrimps from the local shrimp farm were collected and ground in the sterile water. One  $\mu\text{l}$  of either gill and hepatopancreas lysate was used as template for WSSV and VP<sub>AHPND</sub> detections, respectively, by PCR using the specific primers (AP2 for VP<sub>AHPND</sub> and WSSV477 for WSSV).

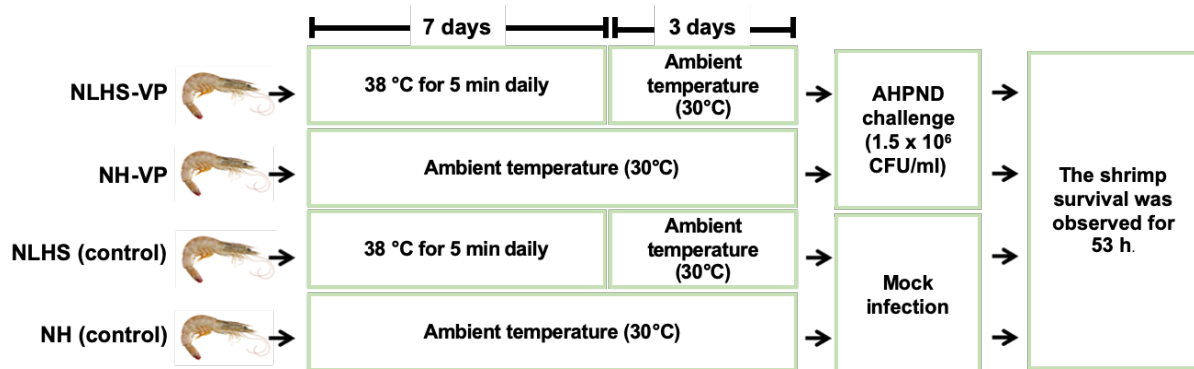

**Fig. S3** The shrimp were divided into four groups of 10 shrimp each. Two groups were NLHS-treated by placing shrimps in tanks containing 10 L sea water at 38 °C for 5 min daily for 7 days and allowed a 3-day recovery period in their respective rearing tanks. The other two groups were reared in the tank at 30 °C as control groups of non-heat treatment. They were, then, challenged with VP<sub>AHPND</sub> by immersion in VP<sub>AHPND</sub> inoculum at a final concentration of  $1.5 \times 10^6$  CFU/mL. TSB containing 1.5% NaCl was used instead of VP<sub>AHPND</sub> inoculum in the control. The shrimp survival was observed for 53 h. The experiment was done in triplicate.

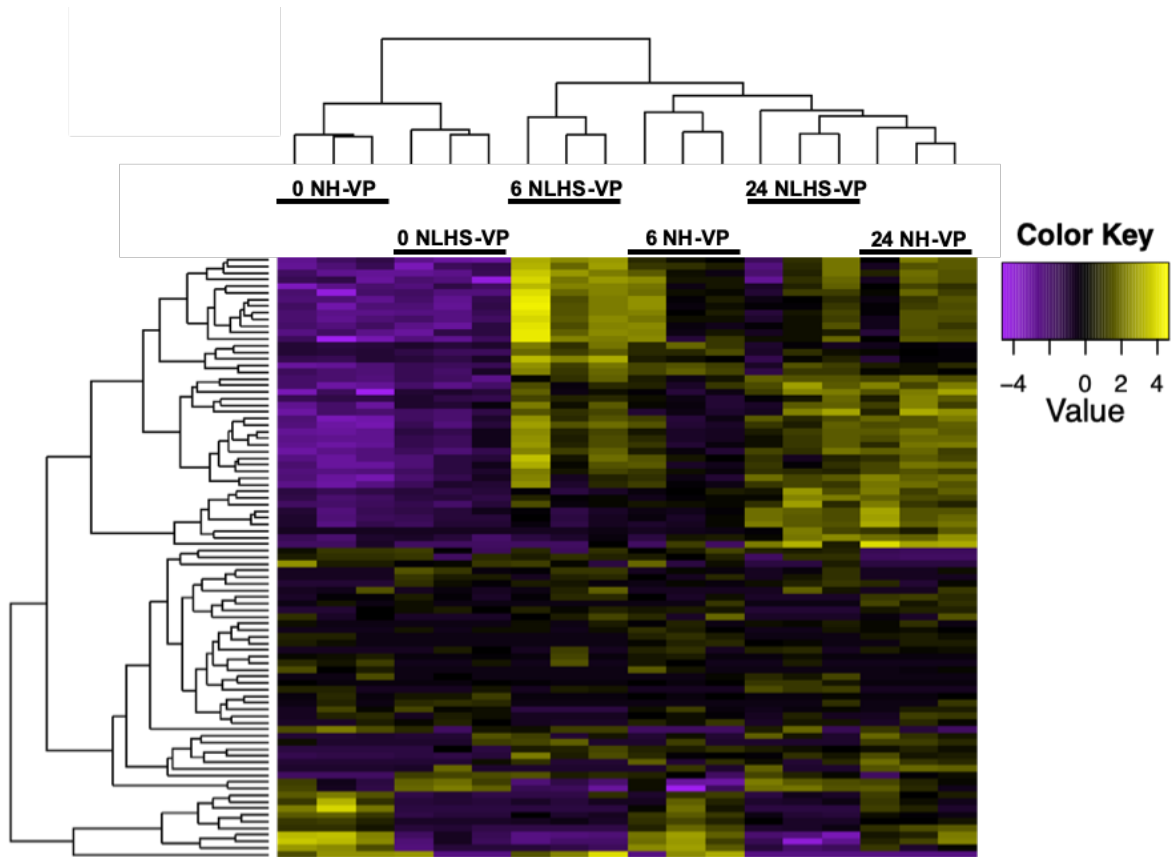

**Fig. S4** Hierarchy-clustered heatmap of (TMM-normalized) FPKM expression values for those genes (represented in rows) that are at least 2-fold differentially expressed ( $P$ -value  $< 0.001$ ).

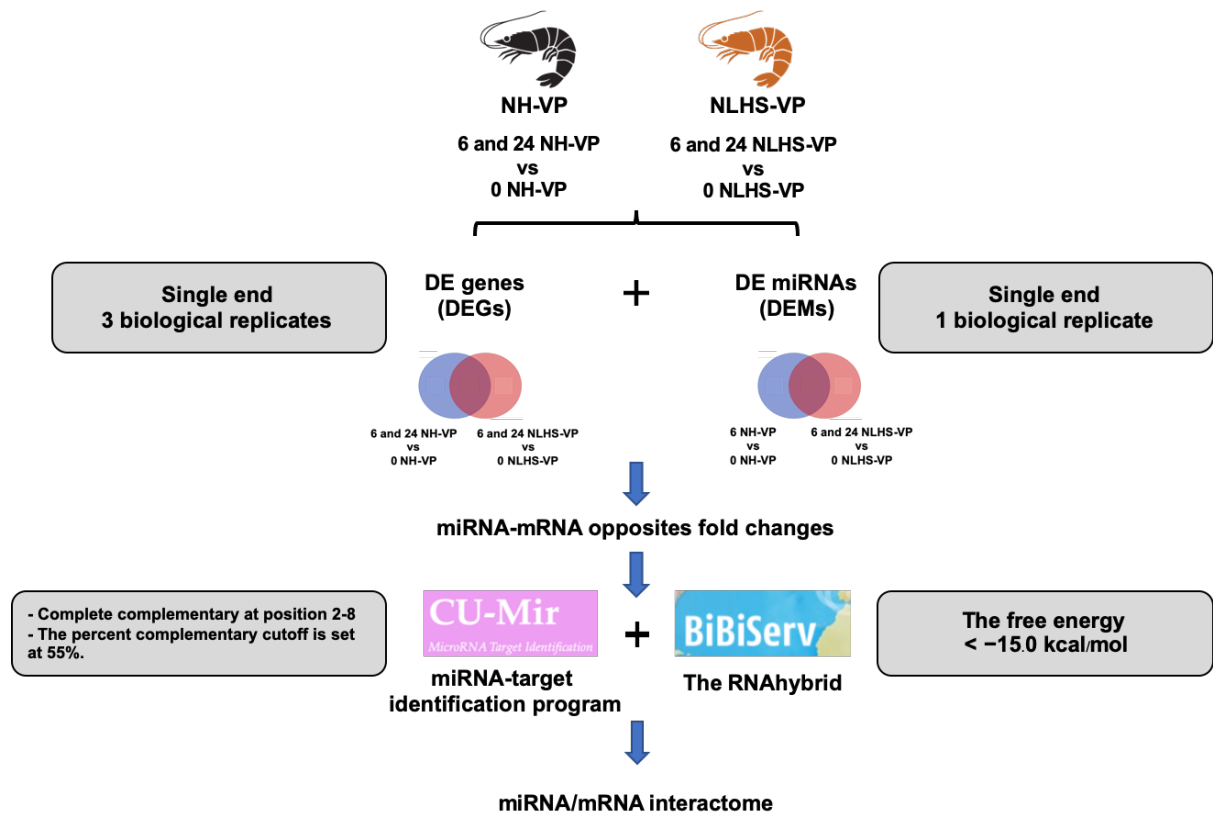

**Fig. S5** Data integration approach. The differentially expressed miRNAs (DEMs) and genes (DEGs) with negative correlation were correlated and integrated. Further, miRNA-mRNA interactions from prediction tools were integrated. Finally, target genes that followed these criteria were considered to build the shrimp NLHS-VP miRNA/mRNA network.

**Table S1** Number of sequences obtained from RNA-Seq in each cDNA library of *L. vannamei* hemocytes after NH or NLHS treatment and VP<sub>AHPND</sub> infection.

| ID           | Condition | Time Point (hpi) | Replicate No. | Number of reads    | Accession numbers |
|--------------|-----------|------------------|---------------|--------------------|-------------------|
| 0NH-VP       | non-heat  | 0                | replicate 1   | 24,914,546         | SRR3993813        |
| 0NH-VP       | non-heat  | 0                | replicate 2   | 18,790,695         | SRR3997616        |
| 0NH-VP       | non-heat  | 0                | replicate 3   | 20,783,002         | SRR3997617        |
| 6NH-VP       | non-heat  | 6                | replicate 1   | 22,850,301         | SRR3997618        |
| 6NH-VP       | non-heat  | 6                | replicate 2   | 23,616,635         | SRR3997619        |
| 6NH-VP       | non-heat  | 6                | replicate 3   | 22,809,007         | SRR3997620        |
| 24NH-VP      | non-heat  | 24               | replicate 1   | 23,665,724         | SRR3997621        |
| 24NH-VP      | non-heat  | 24               | replicate 2   | 23,782,913         | SRR3997622        |
| 24NH-VP      | non-heat  | 24               | replicate 3   | 23,155,408         | SRR3997623        |
| 0 NLHS-VP    | heat      | 0                | replicate 1   | 23,480,445         | SRR3997631        |
| 0 NLHS-VP    | heat      | 0                | replicate 2   | 20,214,421         | SRR3998867        |
| 0 NLHS-VP    | heat      | 0                | replicate 3   | 21,731,765         | SRR3998869        |
| 6 NLHS-VP    | heat      | 6                | replicate 1   | 24,793,063         | SRR3998870        |
| 6 NLHS-VP    | heat      | 6                | replicate 2   | 21,750,763         | SRR3998871        |
| 6 NLHS-VP    | heat      | 6                | replicate 3   | 20,503,721         | SRR3998872        |
| 24 NLHS-VP   | heat      | 24               | replicate 1   | 21,347,015         | SRR3998873        |
| 24 NLHS-VP   | heat      | 24               | replicate 2   | 20,746,438         | SRR3998874        |
| 24 NLHS-VP   | heat      | 24               | replicate 3   | 21,296,952         | SRR3998992        |
| <b>Total</b> |           |                  |               | <b>400,232,814</b> |                   |

**Table S2** Trinity assembly statistics of RNA-Seq of *L. vannamei* hemocytes after NH or NLHS treatment and VP<sub>AHPND</sub> infection.

| <b>Statistics for isotig lengths:</b>       | <b>Value</b> |
|---------------------------------------------|--------------|
| Min isotig length:                          | 201          |
| Max isotig length:                          | 22,966       |
| Mean isotig length:                         | 672.14       |
| Median isotig length:                       | 357          |
| N50 isotig length:                          | 1,074        |
| <b>Statistics for numbers of isotigs:</b>   |              |
| Total trinity 'genes':                      | 174,835      |
| Number of isotigs:                          | 205,137      |
| Number of isotigs >=1kb:                    | 31,106       |
| Number of isotigs in N50:                   | 28,762       |
| <b>Statistics for bases in the isotigs:</b> |              |
| Number of bases in all isotigs:             | 137,880,518  |
| Number of bases in isotigs >=1kb:           | 71,369,224   |
| GC Content of isotigs:                      | 41.32%       |
